# Supplementary material
Source: publisher figshare collection journal article supplement (https://acs.figshare.com/ndownloader/files/3767743)
Supplement: Supplementary file 1 [file 3767743]

 
data_hk25x_7 
 
_audit_creation_method            SHELXL-97 
_chemical_formula_moiety          'C15 H14 Cl N5 O Pd' 
_chemical_formula_sum             'C15 H14 Cl N5 O Pd' 
_chemical_formula_weight          422.16 
 
loop_ 
 _atom_type_symbol 
 _atom_type_description 
 _atom_type_scat_dispersion_real 
 _atom_type_scat_dispersion_imag 
 _atom_type_scat_source 
 'C'  'C'   0.0033   0.0016 
 'International Tables Vol C Tables 4.2.6.8 and 6.1.1.4' 
 'H'  'H'   0.0000   0.0000 
 'International Tables Vol C Tables 4.2.6.8 and 6.1.1.4' 
 'Cl'  'Cl'   0.1484   0.1585 
 'International Tables Vol C Tables 4.2.6.8 and 6.1.1.4' 
 'N'  'N'   0.0061   0.0033 
 'International Tables Vol C Tables 4.2.6.8 and 6.1.1.4' 
 'O'  'O'   0.0106   0.0060 
 'International Tables Vol C Tables 4.2.6.8 and 6.1.1.4' 
 'Pd'  'Pd'  -0.9988   1.0072 
 'International Tables Vol C Tables 4.2.6.8 and 6.1.1.4' 
 
_symmetry_cell_setting            monoclinic
_symmetry_space_group_name_H-M    'P 1 21/c 1'
_symmetry_space_group_name_Hall   '-P 2ybc'
_symmetry_Int_Tables_number       14
 
loop_ 
 _symmetry_equiv_pos_as_xyz 
 'x, y, z' 
 '-x, y+1/2, -z+1/2' 
 '-x, -y, -z' 
 'x, -y-1/2, z-1/2' 
 
_cell_length_a                    16.2240(6) 
_cell_length_b                    4.2386(2) 
_cell_length_c                    23.1836(9) 
_cell_angle_alpha                 90.00 
_cell_angle_beta                  91.2430(10) 
_cell_angle_gamma                 90.00 
_cell_volume                      1593.89(11) 
_cell_formula_units_Z             4 
_cell_measurement_temperature     298 
_cell_measurement_reflns_used     12447 
_cell_measurement_theta_min       3.04 
_cell_measurement_theta_max       27.58 
 
_exptl_crystal_description        prism 
_exptl_crystal_colour             orange 
_exptl_crystal_size_max           0.40 
_exptl_crystal_size_mid           0.10 
_exptl_crystal_size_min           0.06 
_exptl_crystal_density_diffrn     1.759 
_exptl_crystal_density_method     'not measured' 
_exptl_crystal_F_000              840 
_exptl_absorpt_coefficient_mu     1.343 
_exptl_absorpt_correction_type    numerical 
_exptl_absorpt_correction_T_min   0.6157 
_exptl_absorpt_correction_T_max   0.9238 
_exptl_absorpt_process_details    'NUMABS (Rigaku, 1999)' 
 
_diffrn_ambient_temperature       298 
_diffrn_radiation_wavelength      0.71075 
_diffrn_radiation_type            MoK\a 
_diffrn_radiation_source          'sealed tube' 
_diffrn_radiation_monochromator   graphite 
_diffrn_measurement_device_type   'Rigaku SCX mini' 
_diffrn_measurement_method        \w 
_diffrn_detector_area_resol_mean  6.849 
_diffrn_reflns_number             14913 
_diffrn_reflns_av_R_equivalents   0.0780 
_diffrn_reflns_av_sigmaI/netI     0.0685 
_diffrn_reflns_limit_h_min        -21 
_diffrn_reflns_limit_h_max        21 
_diffrn_reflns_limit_k_min        -5 
_diffrn_reflns_limit_k_max        5 
_diffrn_reflns_limit_l_min        -30 
_diffrn_reflns_limit_l_max        30 
_diffrn_reflns_theta_min          3.03 
_diffrn_reflns_theta_max          27.48 
_reflns_number_total              3663 
_reflns_number_gt                 2564 
_reflns_threshold_expression      >2sigma(I) 
 
_computing_data_collection        PROCESS-AUTO 
_computing_cell_refinement        PROCESS-AUTO 
_computing_data_reduction         PROCESS-AUTO 
_computing_structure_solution     'SHELXS-97 (Sheldrick, 2008)' 
_computing_structure_refinement   'SHELXL-97 (Sheldrick, 2008)' 
_computing_molecular_graphics     'CrystalStructure 4.0 (Rigaku, 2010)' 
_computing_publication_material   'CrystalStructure 4.0' 
 
_refine_special_details 
; 
 Refinement of F^2^ against ALL reflections.  The weighted R-factor wR and 
 goodness of fit S are based on F^2^, conventional R-factors R are based 
 on F, with F set to zero for negative F^2^. The threshold expression of 
 F^2^ > 2sigma(F^2^) is used only for calculating R-factors(gt) etc. and is 
 not relevant to the choice of reflections for refinement.  R-factors based 
 on F^2^ are statistically about twice as large as those based on F, and R- 
 factors based on ALL data will be even larger. 
; 
 
_refine_ls_structure_factor_coef  Fsqd  
_refine_ls_matrix_type            full 
_refine_ls_weighting_scheme       calc  
_refine_ls_weighting_details 
 'calc w=1/[\s^2^(Fo^2^)+(0.0342P)^2^+3.1338P] where P=(Fo^2^+2Fc^2^)/3' 
_atom_sites_solution_primary      direct 
_atom_sites_solution_secondary    difmap 
_atom_sites_solution_hydrogens    geom 
_refine_ls_hydrogen_treatment     noref 
_refine_ls_extinction_method      none 
_refine_ls_number_reflns          3663 
_refine_ls_number_parameters      208 
_refine_ls_number_restraints      0 
_refine_ls_R_factor_all           0.0922 
_refine_ls_R_factor_gt            0.0596 
_refine_ls_wR_factor_ref          0.1286 
_refine_ls_wR_factor_gt           0.1170 
_refine_ls_goodness_of_fit_ref    1.113 
_refine_ls_restrained_S_all       1.113 
_refine_ls_shift/su_max           0.002 
_refine_ls_shift/su_mean          0.000 
 
loop_ 
 _atom_site_label 
 _atom_site_type_symbol 
 _atom_site_fract_x 
 _atom_site_fract_y 
 _atom_site_fract_z 
 _atom_site_U_iso_or_equiv 
 _atom_site_adp_type 
 _atom_site_occupancy 
 _atom_site_symmetry_multiplicity 
 _atom_site_calc_flag 
 _atom_site_refinement_flags 
 _atom_site_disorder_assembly 
 _atom_site_disorder_group 
Pd1 Pd 0.19866(2) 0.51089(10) 0.412626(17) 0.04144(16) Uani 1 1 d . . . 
Cl1 Cl 0.15393(11) 0.5534(4) 0.50741(7) 0.0657(5) Uani 1 1 d . . . 
O1 O 0.1755(3) 0.1470(14) 0.2484(2) 0.0819(15) Uani 1 1 d . . . 
N1 N 0.2998(3) 0.7898(11) 0.4253(2) 0.0462(11) Uani 1 1 d . . . 
N2 N 0.2918(5) 0.4974(16) 0.3030(3) 0.086(2) Uani 1 1 d . . . 
N3 N 0.2286(4) 0.4251(13) 0.3326(2) 0.0660(17) Uani 1 1 d . . . 
N4 N 0.1000(3) 0.2376(11) 0.38927(19) 0.0448(11) Uani 1 1 d . . . 
N5 N 0.3888(6) 0.928(2) 0.1227(4) 0.117(3) Uani 1 1 d . . . 
C1 C 0.3111(4) 0.9364(14) 0.4758(3) 0.0543(16) Uani 1 1 d . . . 
H1 H 0.2720 0.9075 0.5041 0.065 Uiso 1 1 calc R . . 
C2 C 0.3774(4) 1.1273(15) 0.4882(3) 0.0618(17) Uani 1 1 d . . . 
H2 H 0.3825 1.2277 0.5238 0.074 Uiso 1 1 calc R . . 
C3 C 0.4359(4) 1.1668(16) 0.4472(3) 0.0620(17) Uani 1 1 d . . . 
H3 H 0.4820 1.2925 0.4544 0.074 Uiso 1 1 calc R . . 
C4 C 0.4254(4) 1.0195(16) 0.3958(3) 0.0617(17) Uani 1 1 d . . . 
H4 H 0.4646 1.0448 0.3675 0.074 Uiso 1 1 calc R . . 
C5 C 0.3555(4) 0.8267(14) 0.3845(3) 0.0493(14) Uani 1 1 d . . . 
C6 C 0.3489(4) 0.6767(16) 0.3275(3) 0.0623(18) Uani 1 1 d . . . 
C7 C 0.1727(4) 0.2277(15) 0.2976(3) 0.0565(16) Uani 1 1 d . . . 
C8 C 0.1007(4) 0.1368(13) 0.3344(2) 0.0442(13) Uani 1 1 d . . . 
C9 C 0.0381(4) -0.0494(13) 0.3119(3) 0.0554(16) Uani 1 1 d . . . 
H5 H 0.0399 -0.1203 0.2740 0.066 Uiso 1 1 calc R . . 
C10 C -0.0270(4) -0.1292(16) 0.3459(3) 0.0646(18) Uani 1 1 d . . . 
H6 H -0.0699 -0.2535 0.3314 0.077 Uiso 1 1 calc R . . 
C11 C -0.0275(4) -0.0241(16) 0.4006(3) 0.0644(17) Uani 1 1 d . . . 
H7 H -0.0709 -0.0752 0.4244 0.077 Uiso 1 1 calc R . . 
C12 C 0.0367(4) 0.1595(16) 0.4213(3) 0.0578(16) Uani 1 1 d . . . 
H8 H 0.0354 0.2313 0.4592 0.069 Uiso 1 1 calc R . . 
C13 C 0.4165(5) 0.721(2) 0.2847(3) 0.092(3) Uani 1 1 d . . . 
H9 H 0.4388 0.5196 0.2746 0.110 Uiso 1 1 calc R . . 
H10 H 0.4593 0.8502 0.3016 0.110 Uiso 1 1 calc R . . 
H11 H 0.3945 0.8228 0.2507 0.110 Uiso 1 1 calc R . . 
C14 C 0.3312(6) 0.807(2) 0.1349(3) 0.082(2) Uani 1 1 d . . . 
C15 C 0.2550(5) 0.659(2) 0.1501(4) 0.099(3) Uani 1 1 d . . . 
H12 H 0.2237 0.6106 0.1156 0.118 Uiso 1 1 calc R . . 
H13 H 0.2240 0.8003 0.1737 0.118 Uiso 1 1 calc R . . 
H14 H 0.2665 0.4686 0.1711 0.118 Uiso 1 1 calc R . . 
 
loop_ 
 _atom_site_aniso_label 
 _atom_site_aniso_U_11 
 _atom_site_aniso_U_22 
 _atom_site_aniso_U_33 
 _atom_site_aniso_U_23 
 _atom_site_aniso_U_13 
 _atom_site_aniso_U_12 
Pd1 0.0425(3) 0.0438(3) 0.0382(2) 0.0043(2) 0.00545(16) 0.0077(2) 
Cl1 0.0726(11) 0.0753(12) 0.0500(9) -0.0149(8) 0.0199(7) -0.0194(9) 
O1 0.079(4) 0.115(4) 0.052(3) 0.005(3) 0.011(2) 0.007(3) 
N1 0.039(3) 0.044(3) 0.056(3) 0.014(2) 0.004(2) 0.007(2) 
N2 0.107(6) 0.092(5) 0.062(4) 0.032(4) 0.029(4) 0.062(4) 
N3 0.088(4) 0.064(4) 0.047(3) 0.019(2) 0.021(3) 0.026(3) 
N4 0.045(3) 0.045(3) 0.045(3) 0.002(2) -0.002(2) 0.008(2) 
N5 0.098(7) 0.148(8) 0.107(7) 0.027(5) 0.022(5) 0.015(6) 
C1 0.049(4) 0.048(4) 0.066(4) 0.011(3) 0.009(3) 0.002(3) 
C2 0.056(4) 0.055(4) 0.074(5) 0.003(3) -0.008(3) 0.003(3) 
C3 0.046(4) 0.061(4) 0.078(5) 0.012(4) -0.010(3) -0.001(3) 
C4 0.042(3) 0.070(4) 0.073(5) 0.016(4) -0.001(3) -0.004(3) 
C5 0.046(4) 0.046(3) 0.056(4) 0.013(3) 0.002(3) 0.006(3) 
C6 0.045(4) 0.056(4) 0.085(5) 0.009(4) -0.018(3) -0.006(3) 
C7 0.058(4) 0.055(4) 0.056(4) 0.010(3) -0.009(3) 0.002(3) 
C8 0.046(4) 0.037(3) 0.049(4) 0.006(2) -0.004(3) 0.007(2) 
C9 0.063(4) 0.047(4) 0.056(4) -0.002(3) -0.011(3) 0.005(3) 
C10 0.058(4) 0.066(4) 0.070(5) 0.005(3) -0.007(3) -0.004(3) 
C11 0.052(4) 0.071(5) 0.069(4) 0.003(4) 0.004(3) -0.008(4) 
C12 0.055(4) 0.065(4) 0.053(4) -0.004(3) 0.003(3) 0.007(3) 
C13 0.096(7) 0.113(7) 0.068(5) -0.003(5) 0.019(4) -0.011(5) 
C14 0.082(6) 0.098(7) 0.067(5) 0.017(4) 0.019(4) 0.025(5) 
C15 0.095(7) 0.119(7) 0.082(6) 0.014(5) 0.024(5) 0.013(6) 
 
_geom_special_details 
; 
 All esds (except the esd in the dihedral angle between two l.s. planes) 
 are estimated using the full covariance matrix.  The cell esds are taken 
 into account individually in the estimation of esds in distances, angles 
 and torsion angles; correlations between esds in cell parameters are only 
 used when they are defined by crystal symmetry.  An approximate (isotropic) 
 treatment of cell esds is used for estimating esds involving l.s. planes. 
; 
 
loop_ 
 _geom_bond_atom_site_label_1 
 _geom_bond_atom_site_label_2 
 _geom_bond_distance 
 _geom_bond_site_symmetry_2 
 _geom_bond_publ_flag 
Pd1 N3 1.962(5) . ? 
Pd1 N1 2.038(5) . ? 
Pd1 N4 2.040(5) . ? 
Pd1 Cl1 2.3360(15) . ? 
O1 C7 1.193(7) . ? 
N1 C5 1.331(7) . ? 
N1 C1 1.335(8) . ? 
N2 N3 1.283(8) . ? 
N2 C6 1.317(10) . ? 
N3 C7 1.466(9) . ? 
N4 C12 1.322(7) . ? 
N4 C8 1.342(7) . ? 
N5 C14 1.109(10) . ? 
C1 C2 1.371(9) . ? 
C1 H1 0.9300 . ? 
C2 C3 1.369(9) . ? 
C2 H2 0.9300 . ? 
C3 C4 1.352(9) . ? 
C3 H3 0.9300 . ? 
C4 C5 1.418(9) . ? 
C4 H4 0.9300 . ? 
C5 C6 1.469(9) . ? 
C6 C13 1.507(9) . ? 
C7 C8 1.512(8) . ? 
C8 C9 1.380(9) . ? 
C9 C10 1.374(9) . ? 
C9 H5 0.9300 . ? 
C10 C11 1.343(9) . ? 
C10 H6 0.9300 . ? 
C11 C12 1.378(9) . ? 
C11 H7 0.9300 . ? 
C12 H8 0.9300 . ? 
C13 H9 0.9600 . ? 
C13 H10 0.9600 . ? 
C13 H11 0.9600 . ? 
C14 C15 1.436(12) . ? 
C15 H12 0.9600 . ? 
C15 H13 0.9600 . ? 
C15 H14 0.9600 . ? 
 
loop_ 
 _geom_angle_atom_site_label_1 
 _geom_angle_atom_site_label_2 
 _geom_angle_atom_site_label_3 
 _geom_angle 
 _geom_angle_site_symmetry_1 
 _geom_angle_site_symmetry_3 
 _geom_angle_publ_flag 
N3 Pd1 N1 91.6(2) . . ? 
N3 Pd1 N4 81.5(2) . . ? 
N1 Pd1 N4 172.86(18) . . ? 
N3 Pd1 Cl1 172.82(18) . . ? 
N1 Pd1 Cl1 94.92(14) . . ? 
N4 Pd1 Cl1 92.03(13) . . ? 
C5 N1 C1 119.0(5) . . ? 
C5 N1 Pd1 121.5(4) . . ? 
C1 N1 Pd1 119.4(4) . . ? 
N3 N2 C6 118.0(7) . . ? 
N2 N3 C7 109.3(6) . . ? 
N2 N3 Pd1 132.8(6) . . ? 
C7 N3 Pd1 117.8(4) . . ? 
C12 N4 C8 118.4(5) . . ? 
C12 N4 Pd1 127.4(4) . . ? 
C8 N4 Pd1 114.1(4) . . ? 
N1 C1 C2 123.5(6) . . ? 
N1 C1 H1 118.3 . . ? 
C2 C1 H1 118.3 . . ? 
C3 C2 C1 118.6(7) . . ? 
C3 C2 H2 120.7 . . ? 
C1 C2 H2 120.7 . . ? 
C4 C3 C2 118.6(7) . . ? 
C4 C3 H3 120.7 . . ? 
C2 C3 H3 120.7 . . ? 
C3 C4 C5 121.0(6) . . ? 
C3 C4 H4 119.5 . . ? 
C5 C4 H4 119.5 . . ? 
N1 C5 C4 119.3(6) . . ? 
N1 C5 C6 123.4(6) . . ? 
C4 C5 C6 117.3(6) . . ? 
N2 C6 C5 132.4(7) . . ? 
N2 C6 C13 107.7(7) . . ? 
C5 C6 C13 119.8(6) . . ? 
O1 C7 N3 131.2(6) . . ? 
O1 C7 C8 120.8(6) . . ? 
N3 C7 C8 108.0(6) . . ? 
N4 C8 C9 121.2(5) . . ? 
N4 C8 C7 118.5(5) . . ? 
C9 C8 C7 120.3(6) . . ? 
C10 C9 C8 119.6(6) . . ? 
C10 C9 H5 120.2 . . ? 
C8 C9 H5 120.2 . . ? 
C11 C10 C9 118.7(7) . . ? 
C11 C10 H6 120.7 . . ? 
C9 C10 H6 120.7 . . ? 
C10 C11 C12 119.8(6) . . ? 
C10 C11 H7 120.1 . . ? 
C12 C11 H7 120.1 . . ? 
N4 C12 C11 122.4(6) . . ? 
N4 C12 H8 118.8 . . ? 
C11 C12 H8 118.8 . . ? 
C6 C13 H9 109.5 . . ? 
C6 C13 H10 109.5 . . ? 
H9 C13 H10 109.5 . . ? 
C6 C13 H11 109.5 . . ? 
H9 C13 H11 109.5 . . ? 
H10 C13 H11 109.5 . . ? 
N5 C14 C15 178.0(10) . . ? 
C14 C15 H12 109.5 . . ? 
C14 C15 H13 109.5 . . ? 
H12 C15 H13 109.5 . . ? 
C14 C15 H14 109.5 . . ? 
H12 C15 H14 109.5 . . ? 
H13 C15 H14 109.5 . . ? 
 
loop_ 
 _geom_torsion_atom_site_label_1 
 _geom_torsion_atom_site_label_2 
 _geom_torsion_atom_site_label_3 
 _geom_torsion_atom_site_label_4 
 _geom_torsion 
 _geom_torsion_site_symmetry_1 
 _geom_torsion_site_symmetry_2 
 _geom_torsion_site_symmetry_3 
 _geom_torsion_site_symmetry_4 
 _geom_torsion_publ_flag 
N3 Pd1 N1 C5 -3.6(4) . . . . ? 
N4 Pd1 N1 C5 -19.8(16) . . . . ? 
Cl1 Pd1 N1 C5 173.5(4) . . . . ? 
N3 Pd1 N1 C1 177.3(4) . . . . ? 
N4 Pd1 N1 C1 161.0(12) . . . . ? 
Cl1 Pd1 N1 C1 -5.7(4) . . . . ? 
C6 N2 N3 C7 179.6(5) . . . . ? 
C6 N2 N3 Pd1 -3.7(9) . . . . ? 
N1 Pd1 N3 N2 5.5(6) . . . . ? 
N4 Pd1 N3 N2 -176.6(6) . . . . ? 
Cl1 Pd1 N3 N2 -150.0(11) . . . . ? 
N1 Pd1 N3 C7 -178.1(4) . . . . ? 
N4 Pd1 N3 C7 -0.1(4) . . . . ? 
Cl1 Pd1 N3 C7 26.4(16) . . . . ? 
N3 Pd1 N4 C12 -178.8(5) . . . . ? 
N1 Pd1 N4 C12 -162.3(12) . . . . ? 
Cl1 Pd1 N4 C12 4.4(5) . . . . ? 
N3 Pd1 N4 C8 -0.6(4) . . . . ? 
N1 Pd1 N4 C8 15.9(16) . . . . ? 
Cl1 Pd1 N4 C8 -177.4(4) . . . . ? 
C5 N1 C1 C2 0.5(9) . . . . ? 
Pd1 N1 C1 C2 179.7(5) . . . . ? 
N1 C1 C2 C3 -1.0(10) . . . . ? 
C1 C2 C3 C4 0.8(10) . . . . ? 
C2 C3 C4 C5 -0.2(10) . . . . ? 
C1 N1 C5 C4 0.2(8) . . . . ? 
Pd1 N1 C5 C4 -179.0(4) . . . . ? 
C1 N1 C5 C6 -179.9(5) . . . . ? 
Pd1 N1 C5 C6 0.9(8) . . . . ? 
C3 C4 C5 N1 -0.3(9) . . . . ? 
C3 C4 C5 C6 179.8(6) . . . . ? 
N3 N2 C6 C5 -1.6(11) . . . . ? 
N3 N2 C6 C13 178.9(6) . . . . ? 
N1 C5 C6 N2 2.9(11) . . . . ? 
C4 C5 C6 N2 -177.2(7) . . . . ? 
N1 C5 C6 C13 -177.6(6) . . . . ? 
C4 C5 C6 C13 2.3(9) . . . . ? 
N2 N3 C7 O1 -4.6(10) . . . . ? 
Pd1 N3 C7 O1 178.2(6) . . . . ? 
N2 N3 C7 C8 177.9(5) . . . . ? 
Pd1 N3 C7 C8 0.6(6) . . . . ? 
C12 N4 C8 C9 -1.3(8) . . . . ? 
Pd1 N4 C8 C9 -179.7(4) . . . . ? 
C12 N4 C8 C7 179.6(5) . . . . ? 
Pd1 N4 C8 C7 1.2(6) . . . . ? 
O1 C7 C8 N4 -179.0(6) . . . . ? 
N3 C7 C8 N4 -1.2(7) . . . . ? 
O1 C7 C8 C9 1.9(9) . . . . ? 
N3 C7 C8 C9 179.7(5) . . . . ? 
N4 C8 C9 C10 1.1(9) . . . . ? 
C7 C8 C9 C10 -179.9(5) . . . . ? 
C8 C9 C10 C11 -0.4(10) . . . . ? 
C9 C10 C11 C12 -0.1(10) . . . . ? 
C8 N4 C12 C11 0.9(9) . . . . ? 
Pd1 N4 C12 C11 179.1(5) . . . . ? 
C10 C11 C12 N4 -0.2(11) . . . . ? 
 
_diffrn_measured_fraction_theta_max    0.998 
_diffrn_reflns_theta_full              27.48 
_diffrn_measured_fraction_theta_full   0.998 
_refine_diff_density_max    1.004 
_refine_diff_density_min   -0.583 
_refine_diff_density_rms    0.102 
